# Supplementary material for: Sequential intervention of anti-inflammatory and osteogenesis with silk fibroin coated polyethylene terephthalate artificial ligaments for anterior cruciate ligament reconstruction
Source: Royal Society of Chemistry journal article supplement (doi:10.1039/d3tb00911d), 2023-01-01
Supplement: d3tb00911d1.pdf [file d3tb00911d1.pdf]

*Supporting Information*

**Sequential intervention of anti-inflammatory and osteogenesis with silk fibroin coated polyethylene terephthalate artificial ligaments for anterior cruciate ligament reconstruction**

Ni Chen<sup>1,†</sup>, Wenhe Jin<sup>2,†</sup>, Han Gao<sup>2</sup>, Jiachan Hong<sup>1</sup>, Luyi Sun<sup>2</sup>, Jinrong Yao<sup>1</sup>, Xin

Chen<sup>1</sup>, Jun Chen<sup>2,\*</sup>, Shiyi Chen<sup>2,\*</sup>, Zhengzhong Shao<sup>1,\*</sup>

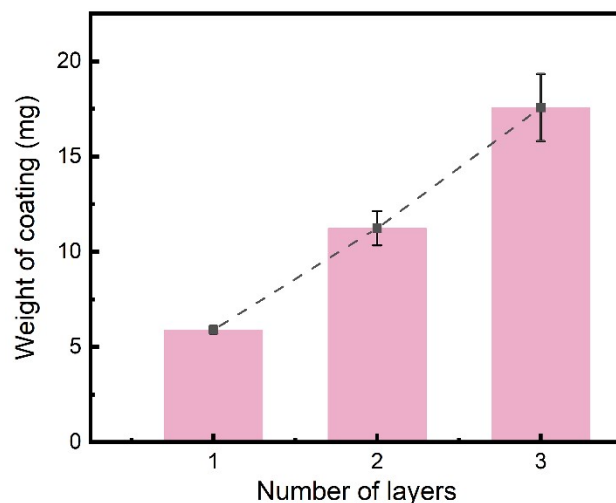

Figure S1. Weight change of RSF coating as the increase of the number of layers.

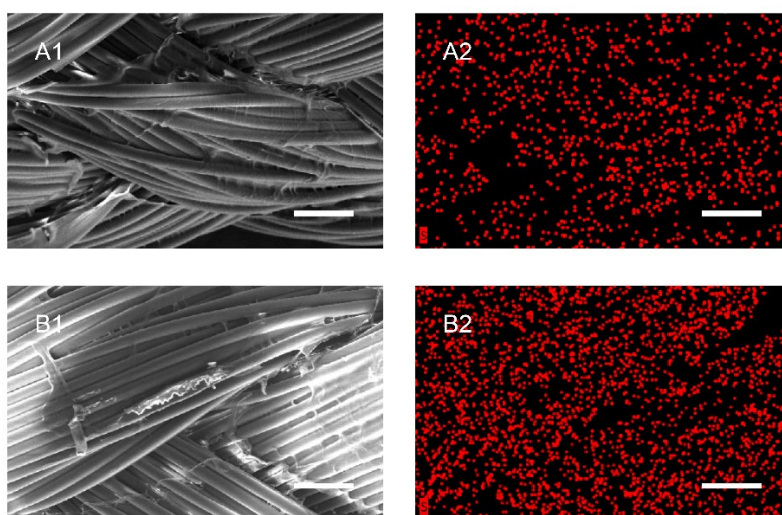

Figure S2. EDS results of H@PET (A1: SEM image; A2: S element mapping) and H/B@PET (B1: SEM image; B2: S element mapping). Scale bar is 100  $\mu$ m.

Table S1. EDS results of PET, H@PET and H/B@PET.

| Samples | C (%) | O (%) | N (%) | S (%) |
|---------|-------|-------|-------|-------|
| PET     | 63.9  | 36.1  | -     | -     |
| H@PET   | 58.78 | 28.29 | 12.79 | 0.14  |
| H/B@PET | 58.97 | 29.22 | 11.66 | 0.16  |
